# Supplementary material for: A Dynamic Model of Opioid Overdose Deaths in Canada during the Co-Occurring Opioid Overdose Crisis and COVID-19 Pandemic
Source: MDPI journal article supplement (doi:10.3390/ijerph21040442), 2024-04-04
Supplement: s1 [file s1]

**Table S1.** Initial values of stocks, evidence sources and detailed explanations.

| Concept                                                                      | Stock | Initial Value                     | Source of Evidence                                                                                                                     |
|------------------------------------------------------------------------------|-------|-----------------------------------|----------------------------------------------------------------------------------------------------------------------------------------|
| Population                                                                   | A     | 3.0874E-7                         | Statistics Canada. Table 17-10-0005-01 Population estimates on July 1st, by age and sex, population 15+ [15]                           |
| No opioid use                                                                | B     | $A - (C + D + E + F + G + H + I)$ | Calculated from other starting values                                                                                                  |
| Short-term prescription use                                                  | C     | 262,170                           | Calculated based on value from CIHI report applied to 2016 population [16]                                                             |
| Long-term prescription use                                                   | D     | 690,594                           | Calculated based on value from CIHI report applied to 2016 population [16]                                                             |
| Previous long-term prescription use                                          | E     | 700,000                           | Modeling team judgement, based on estimate in D                                                                                        |
| Prescription use not as prescribed                                           | F     | 320,256                           | Statistics Canada estimate from 2018 Canadian Community Health Survey pain relieving medication module, scaled to 2016 population [17] |
| Previous prescription use not as prescribed                                  | G     | 100,000                           | Modeling team judgement                                                                                                                |
| Non-medical use (illicit and illegal opioids)                                | H     | 200,000                           | Conservative mean estimate is 500 per 100,000 based on coroner's data; 511.8 per 100,000 in another paper; [18] [19]                   |
| Previous non-medical use                                                     | I     | No initial value provided         |                                                                                                                                        |
| Mortality from other causes among those using long-term prescription opioids | J     | No initial value provided         |                                                                                                                                        |
| Mortality from opioid overdose                                               | K     | No initial value provided         |                                                                                                                                        |
| Mortality from other causes among those using non-medical opioids            | L     | No initial value provided         |                                                                                                                                        |

**Table S2.** Model parameter values, evidence sources and detailed explanations.

| Concept                                                                  | Parameter Name | Parameter Value                       | Notes                                                                                                                                                                                                                       | Evidence Source |
|--------------------------------------------------------------------------|----------------|---------------------------------------|-----------------------------------------------------------------------------------------------------------------------------------------------------------------------------------------------------------------------------|-----------------|
| Population Increase                                                      | $\alpha$       | 0.014 per year<br>0.00117 per month   | Calculated as the monthly percent population increase from 2018 - 2019                                                                                                                                                      | [15]            |
| Rate starting opioid prescription varies during first four years         | $\beta$        | n/a                                   | Calculated the average yearly decrease based on prevalence of 9.5% in 2013 and 8.1% in 2018. Values for 2016, 2017, and 2019 were calculated based on a 0.28% per year change                                               | [20]            |
| Opioid Rx 2016                                                           | 2016           | 0.0866/12 per month                   |                                                                                                                                                                                                                             |                 |
| Opioid Rx 2017                                                           | 2017           | 0.0838/12 per month                   |                                                                                                                                                                                                                             |                 |
| Opioid Rx 2018                                                           | 2018           | 0.081/12 per month                    |                                                                                                                                                                                                                             |                 |
| Opioid Rx 2019                                                           | 2019           | 0.0782/12 per month                   |                                                                                                                                                                                                                             |                 |
| Proportion new short-term prescription use                               | $\gamma$       | 0.9                                   | Proportion of people starting opioids whose duration of use is less than 30 days                                                                                                                                            | [20]            |
| Rate stopping short-term prescription use                                | $\delta$       | 0.9 per month                         | 90% of people started opioids have a duration of less than 30 days                                                                                                                                                          | [20]            |
| Rate prescription use to use not as prescribed                           | $\epsilon$     | 0.093 per year<br>0.00775 per month   | 9.3% of people with a long-term prescription go on to addition                                                                                                                                                              | [21]            |
| Rate stopping long-term prescription use                                 | $\zeta$        | 0.017 per month                       | 20% of people on long-term therapy stopped for at least six months in 2017                                                                                                                                                  | [20]            |
| Rate previous long-term to new prescription use                          | $\eta$         | 0.65 per year<br>0.55 per month       | 2/3 of those on long-term therapy who stopped for at least six months started an opioid again in the next year                                                                                                              | [20]            |
| Rate to no long-term prescription use                                    | $\theta$       | 0.08796 per year<br>0.00733 per month | 4.4% of people stopped long-term prescription opioids and changed to a non-opioid pain medication within six months, which is used to move people from the stopping long-term prescription stock to the no opioid use stock | [20]            |
| Rate of all-cause mortality among those using long-term prescription use | $\iota$        | 0.06 per year<br>0.005 per month      | 6% of those with long term opioid initiation died within a year of follow up from all cause mortality                                                                                                                       | [22]            |

|                                                                                                     |           |                                        |                                                                                                                                                                                                   |                                                                                                                                            |
|-----------------------------------------------------------------------------------------------------|-----------|----------------------------------------|---------------------------------------------------------------------------------------------------------------------------------------------------------------------------------------------------|--------------------------------------------------------------------------------------------------------------------------------------------|
| Rate of moving from prescription use not as prescribed to non-medical use                           | $\kappa$  | 0.065 per year<br>0.0054 per month     | Fishbain (2008) article provides prescription use to addiction. This parameter is use not as prescribed to non-medical use. Half the lower bound as the parameter value 0.204 (range: 0.13 – 0.4) | [23]                                                                                                                                       |
| Rate start non-medical use                                                                          | $\lambda$ | 0.00006 per year<br>0.000005 per month | n/a                                                                                                                                                                                               | [24]                                                                                                                                       |
| Rate stop using prescription not as prescribed and non-medical use                                  | $\mu$     | 0.09 per year<br>0.0075 per month      | Rate of remission from opioid dependence – conservative estimate 0.0917 (95% CI 0.0842, 0.0979)                                                                                                   | [25]                                                                                                                                       |
| Delay to no use                                                                                     | $\nu$     | 0.028                                  | Represents a 3-year delay to move from previous non-medical use to no use                                                                                                                         | Modelling team judgement, based on a conservative judgement of how long it would take to return to the same risk as the general population |
| Rate restart non-medical use                                                                        | $\xi$     | 0.20 per year<br>0.017 per month       | Caldwell uses a value ranging from 0 to 45% per month for relapse post-rehab; this is more conservative rate                                                                                      | [26]                                                                                                                                       |
| Rate of opioid-related mortality from long-term prescription use                                    | $\phi$    | 0.0000582769 per month                 | 59 opioid related deaths among 32,449 patients on long-term opioid therapy, deaths occur at a median of 2.6 years                                                                                 | [27]                                                                                                                                       |
| Rate of opioid-related mortality from short-term prescription use                                   | $\pi$     | 0.0000043333 per month                 | 5.2 per 100,000 per year                                                                                                                                                                          | [21]                                                                                                                                       |
| Rate of opioid-related mortality from prescription opioid use not as prescribed and non-medical use |           |                                        |                                                                                                                                                                                                   |                                                                                                                                            |
| Initial value                                                                                       | $q$       | 0.000542 per month                     | Annual crude mortality rate due to opioid overdose among people who use opioids; 0.65 per 100 people per year                                                                                     | [28]                                                                                                                                       |
| Optimized value                                                                                     | $q'$      | 0.000318 per month                     |                                                                                                                                                                                                   |                                                                                                                                            |
| Rate of mortality from all other causes among people with non-medical use                           | $\sigma$  | 0.000783 per month                     | 1.59 per 100 PY minus rate of mortality from non-medical opioids (0.65 per 100 PYs)                                                                                                               | [29]                                                                                                                                       |

|                                                                           |            |                                                                                        |                                                                                                                                                                    |
|---------------------------------------------------------------------------|------------|----------------------------------------------------------------------------------------|--------------------------------------------------------------------------------------------------------------------------------------------------------------------|
| Seasonality value                                                         | $\tau$     | 1.02, 1.01, 0.95, and 0.99<br>for Quarters 1 through<br>4                              | Calculated based on<br>pre-pandemic quar-<br>terly variation in opi-<br>oid overdose deaths [2]                                                                    |
| Proxy for level of fentanyl in the<br>drug supply                         | $\upsilon$ | 2016 – 0.25<br>2017 – 0.48<br>2018 – 0.61<br>2019 – 0.08<br>2020 – 1.00<br>2021 – 1.22 | Health Canada Drug<br>Analysis Services [30]<br>Ratio of annual num-<br>ber of samples ana-<br>lysed by containing<br>fentanyl per year, 2020<br>as reference year |
| Level of deaths prevented<br>through health interventions                 | $\varphi$  | See Appendix 3                                                                         | Value developed by<br>modelling team as de-<br>scribed in methods                                                                                                  |
| Mortality multiplication factor for<br>prescription use not as prescribed |            |                                                                                        |                                                                                                                                                                    |
| Initial value                                                             | $\chi$     | 1                                                                                      | Modelling team judge-<br>ment for starting value<br>and range, optimized<br>value determined<br>through calibration,<br>values could range<br>from 0.1 to 1        |
| Optimized value                                                           | $\chi'$    | 0.1                                                                                    |                                                                                                                                                                    |
| Mortality multiplication factor for<br>fentanyl                           |            |                                                                                        |                                                                                                                                                                    |
| Initial value                                                             | $\psi$     | 5                                                                                      | Modelling team judge-<br>ment for starting value<br>and range, optimized<br>value determined<br>through calibration,<br>values could range<br>from 1 to 10         |
| Optimized value                                                           | $\psi'$    | 10                                                                                     |                                                                                                                                                                    |

**Table S3.** Value of level of deaths prevented through health interventions, as described in methods.

| Year | Quarter | Month | Value |
|------|---------|-------|-------|
| 2016 | 1       | 0     | 1.0   |
|      |         | 1     | 1.0   |
|      |         | 2     | 0.99  |
|      |         | 3     | 0.97  |
|      |         | 4     | 0.96  |
|      |         | 5     | 0.95  |
|      |         | 6     | 0.94  |
|      |         | 7     | 0.92  |
|      |         | 8     | 0.91  |
|      |         | 9     | 0.9   |
|      |         | 10    | 0.89  |
|      |         | 11    | 0.87  |
|      |         | 12    | 0.86  |

|      |   |    |      |
|------|---|----|------|
| 2017 | 1 | 1  | 0.85 |
|      | 1 | 2  | 0.83 |
|      | 1 | 3  | 0.82 |
|      | 2 | 4  | 0.81 |
|      | 2 | 5  | 0.8  |
|      | 2 | 6  | 0.78 |
|      | 3 | 7  | 0.77 |
|      | 3 | 8  | 0.76 |
|      | 3 | 9  | 0.74 |
|      | 4 | 10 | 0.73 |
|      | 4 | 11 | 0.72 |
|      | 4 | 12 | 0.71 |
| 2018 | 1 | 1  | 0.69 |
|      | 1 | 2  | 0.68 |
|      | 1 | 3  | 0.67 |
|      | 2 | 4  | 0.66 |
|      | 2 | 5  | 0.64 |
|      | 2 | 6  | 0.63 |
|      | 3 | 7  | 0.62 |
|      | 3 | 8  | 0.6  |
|      | 3 | 9  | 0.59 |
|      | 4 | 10 | 0.58 |
|      | 4 | 11 | 0.57 |
|      | 4 | 12 | 0.55 |
| 2019 | 1 | 1  | 0.54 |
|      | 1 | 2  | 0.53 |
|      | 1 | 3  | 0.51 |
|      | 2 | 4  | 0.5  |
|      | 2 | 5  | 0.49 |
|      | 2 | 6  | 0.48 |
|      | 3 | 7  | 0.46 |
|      | 3 | 8  | 0.45 |
|      | 3 | 9  | 0.44 |
|      | 4 | 10 | 0.43 |
|      | 4 | 11 | 0.41 |
|      | 4 | 12 | 0.4  |
